# Supplementary material for: A central role for canonical PRC1 in shaping the 3D nuclear landscape
Source: PubMed Central journal article supplement (PMC7328521; doi:10.1101/gad.336487.120), 2020-07-01
Supplement: supp_gad.336487.120_Supplemental_Fig_1.pdf [file supp_gad.336487.120_Supplemental_Fig_1.pdf]

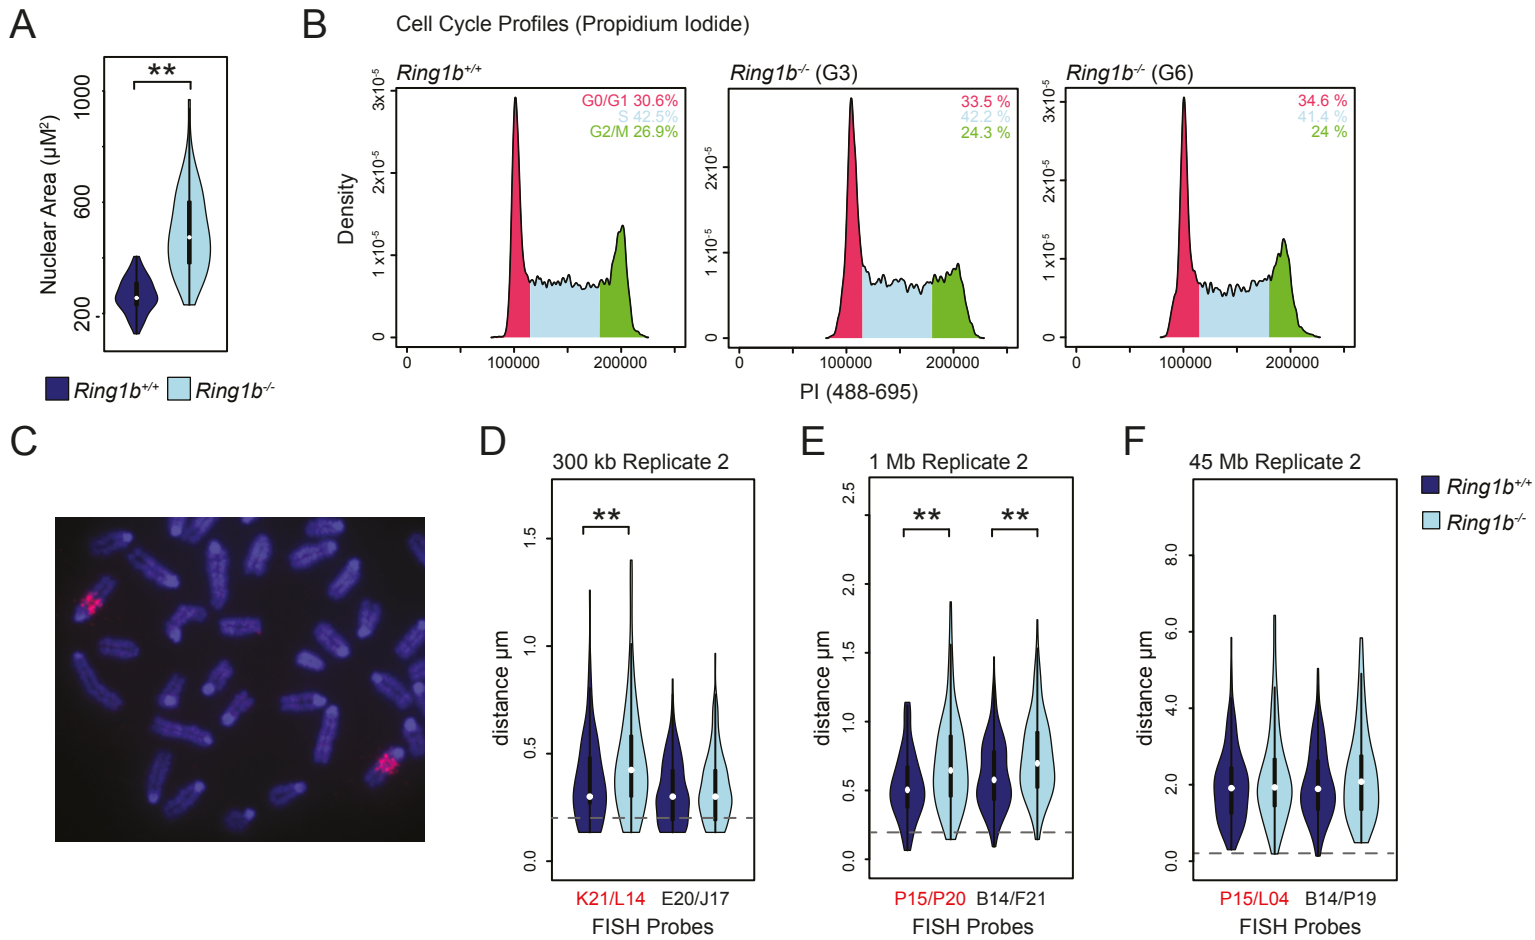

**Supplemental Fig. 1. Cytological Analysis of *Ring1b*<sup>+/+</sup> vs. *Ring1b*<sup>-/-</sup> mESCs.** (A) Violin plot depicting the nuclear area of *Ring1b*<sup>+/+</sup> and *Ring1b*<sup>-/-</sup> mESCs determined by DAPI staining of 2D nuclear preparations (independent replicate experiment to that shown in Fig. 1A). A significant shift in nuclear area is indicated (\*\* $p = 6.94 \times 10^{-19}$ , as determined by a Mann-Whitney test). (B) Histogram profiles of fluorescence-activated cell sorting (FACS) data from propidium iodide stained *Ring1b*<sup>+/+</sup> and *Ring1b*<sup>-/-</sup> mESCs (two independent *Ring1b*<sup>-/-</sup> clones are shown - G3 and G6). The relative distribution of cells in G0/G1, S and G2/M are indicated in parenthesis (red, blue and green respectively). (C) Representative FISH image of the chromosome 6 polycomb positive oligonucleotide probe signal on metaphase chromosomes from wildtype mESCs. (D-F) Violin plots of inter-probe distances for the indicated fosmid (locations shown in Fig. 1C) in *Ring1b*<sup>+/+</sup> and *Ring1b*<sup>-/-</sup> mESCs (independent replicate experiment to that shown in Fig. 1G-I). Probes separated by  $< 0.2 \mu\text{m}$  (dashed grey line) are considered to be co-localised. A significant shift in inter-probe distance between *Ring1b*<sup>+/+</sup> and *Ring1b*<sup>-/-</sup> mESCs is indicated (\*\* $p = 2.38 \times 10^{-3}$  (G) and \*\* $p = 2.09 \times 10^{-5}$  and \*\* $7.88 \times 10^{-5}$  (H); as determined by Mann-Whitney test).
