# Supplementary material for: A central role for canonical PRC1 in shaping the 3D nuclear landscape
Source: PubMed Central journal article supplement (PMC7328521; doi:10.1101/gad.336487.120), 2020-07-01
Supplement: supp_gad.336487.120_Supplemental_Fig_2.pdf [file supp_gad.336487.120_Supplemental_Fig_2.pdf]

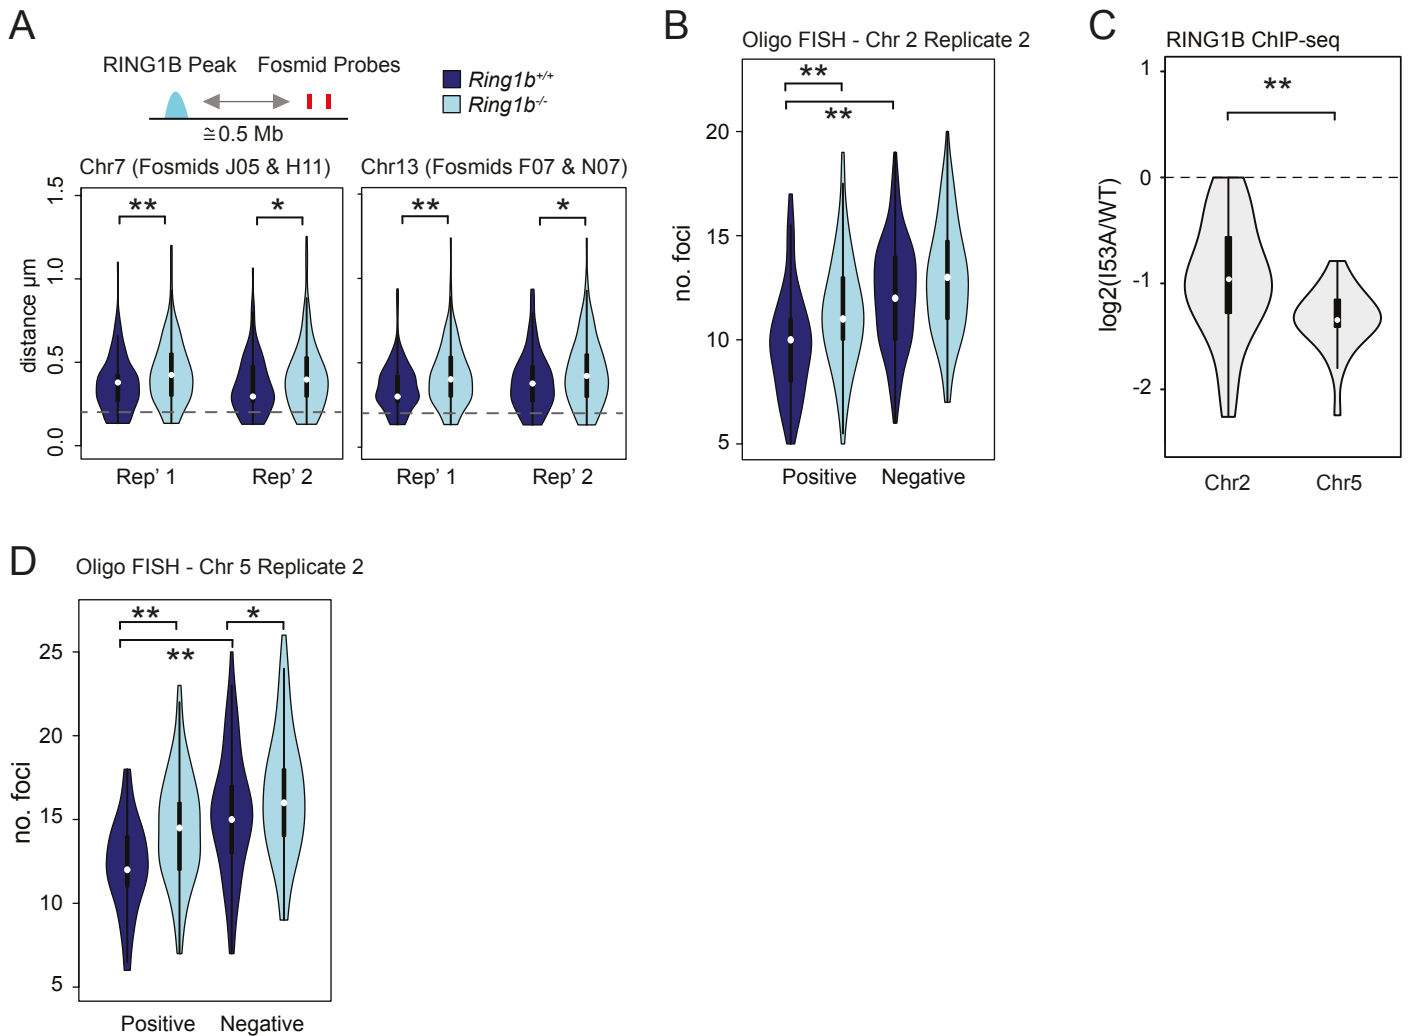

**Supplemental Fig. 2. Loss of PRC1 Reduces Nuclear Clustering at Sites Lacking RING1B.** (A) Violin plots showing the distribution of inter-probe distances determined by 3D FISH of *Ring1b*<sup>+/+</sup> and *Ring1b*<sup>-/-</sup> mESCs hybridised with fosmid probes situated at non-RING1B sites on chromosome 7 and 13 (left and right panels respectively; fosmids are located approximately 0.5 Mb from the closest RING1B peak). A significant shift in inter-probe distance, as determined by a Mann Whitney test, is indicated (\*\* $p = 7.79 \times 10^{-5}$ , \* $p = 1.53 \times 10^{-2}$ , \*\* $p = 6.54 \times 10^{-4}$  and \* $p = 1.58 \times 10^{-2}$  from left to right). Genomic locations are given for the mm9 genome build. Each plot shows the result of two independent replicates. Probes separated by less than 0.2  $\mu$ m (dashed grey line) are considered to be co-localised. (B) Violin plots depicting the number of discrete fluorescent foci in *Ring1b*<sup>+/+</sup> and *Ring1b*<sup>-/-</sup> mESCs hybridised with either the polycomb positive or negative oligonucleotide probes on chromosome 2 (second independent replicate to that shown in Fig. 2C). The significance of a shift in the number of discrete foci between a given pair of samples was tested using a Mann Whitney test, the results of which are indicated (\*\* $p \leq 0.01$ ). (C) Violin plot showing the log<sub>2</sub> ratio (*Ring1b*<sup>I53A/I53A</sup> vs. *Ring1b*<sup>+/+</sup>) of RING1B ChIP-seq signal across all RING1B peaks within the chromosome 2 (42,398-93,905 Mb) and chromosome 5 (42.40-93.91 Mb) regions representing the PcG+ positive and a second proposed PcG+ oligonucleotide probe respectively ( $\pm 100$  kb). A significantly greater reduction in RING1B levels across the chromosome 5 region was observed (\*\* $p = 0.00114$ ; Mann Whitney test). (D) Violin plots depicting the number of discrete fluorescent foci in *Ring1b*<sup>+/+</sup> and *Ring1b*<sup>-/-</sup> mESCs hybridised with either the polycomb positive or negative oligonucleotide probes on chromosome 5 (second independent replicate to that shown in Fig. 2F). The significance of a shift in the number of discrete foci between a given pair of samples is indicated (\* $p \leq 0.05$  and \*\* $p \leq 0.01$ ; Mann Whitney test).
