# Supplementary material for: A central role for canonical PRC1 in shaping the 3D nuclear landscape
Source: PubMed Central journal article supplement (PMC7328521; doi:10.1101/gad.336487.120), 2020-07-01
Supplement: supp_gad.336487.120_Supplemental_Fig_3.pdf [file supp_gad.336487.120_Supplemental_Fig_3.pdf]

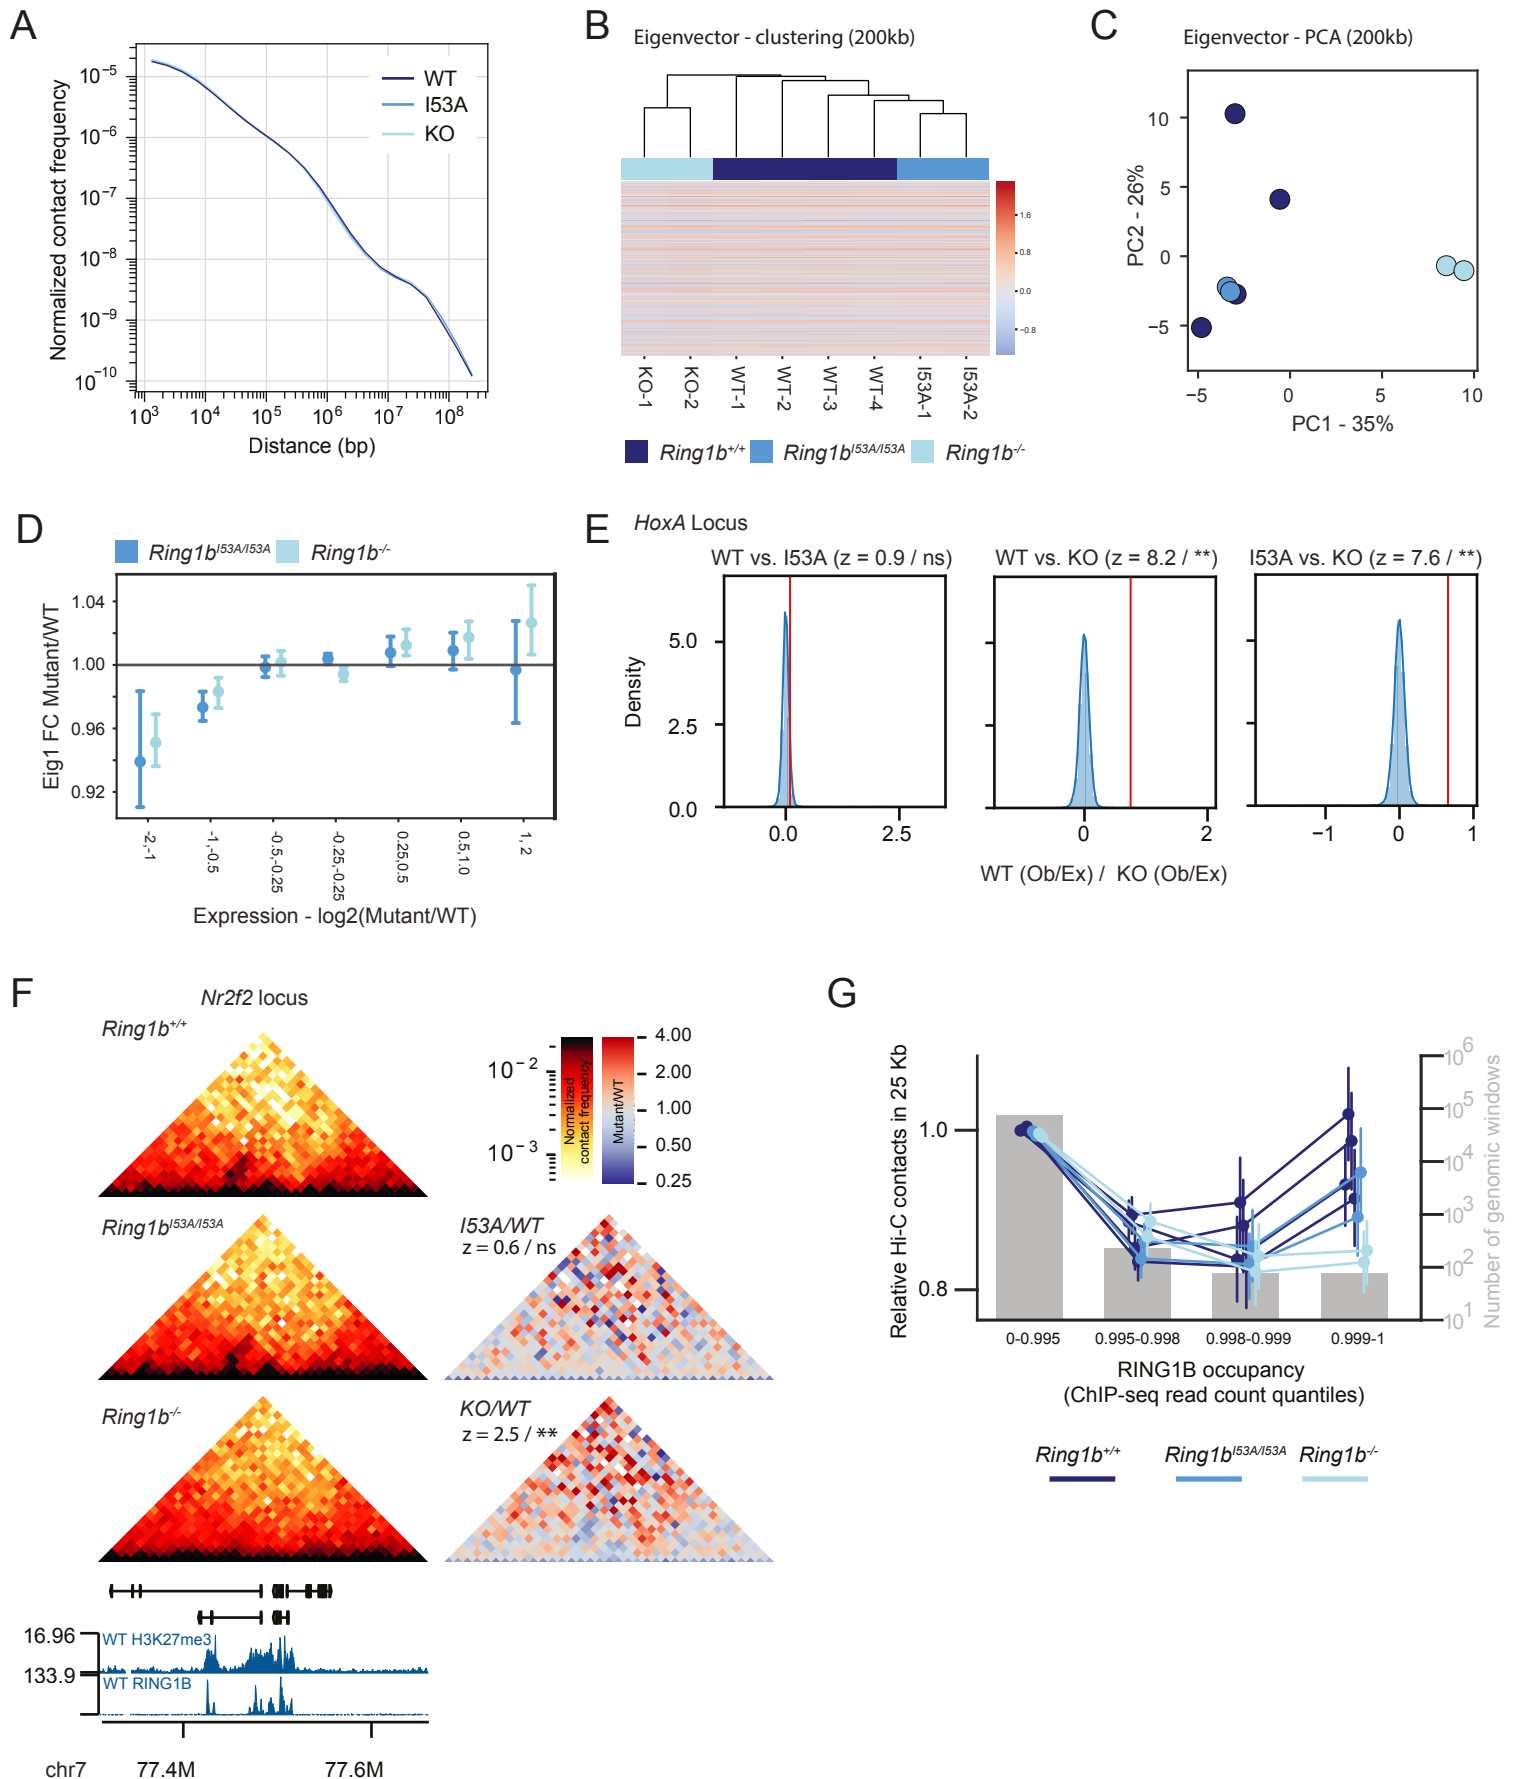

**Supplemental Fig. 3. Validation of Hi-C analysis.** (A) Curves of probability of contact at different distance separations for *Ring1b*<sup>+/+</sup>, *Ring1b*<sup>I53A/I53A</sup> and *Ring1b*<sup>-/-</sup> cells. (B) Clustering of first eigenvectors (200 kb resolution) for replicates of Hi-C data for *Ring1b*<sup>+/+</sup>, *Ring1b*<sup>I53A/I53A</sup> and *Ring1b*<sup>-/-</sup> mESCs. (C) PCA analysis of eigenvectors from (B). (D) Median fold-change of first eigenvectors from Hi-C data from *Ring1b*<sup>I53A/I53A</sup> and *Ring1b*<sup>-/-</sup> mESCs relative to *Ring1b*<sup>+/+</sup> mESCs (error bars show 95% confidence interval obtained by bootstrapping), for all 50 kb bins grouped by average  $\log_2$  fold change in gene expression relative to *Ring1b*<sup>+/+</sup> within the bin. (E) Statistical estimation of contact frequency changes within the *HoxA* cluster for all pairwise comparisons between *Ring1b*<sup>+/+</sup>, *Ring1b*<sup>I53A/I53A</sup> and *Ring1b*<sup>-/-</sup> cells. Shown are histograms of ratios of observed/expected signal for 10,000 random regions on the same chromosome (bars) and its associated kernel-density estimate (curve). The red vertical line represents the value for the *HoxA* region. Z-value and level of significance shown. (F) Same as Fig. 3A, but for the *Nr2f2* region (statistical estimation performed on chr7 77.43 – 77.52 Mb; mm9 genome build). (G) Same as Fig. 3E, but for individual replicates.
