# Supplementary material for: A central role for canonical PRC1 in shaping the 3D nuclear landscape
Source: PubMed Central journal article supplement (PMC7328521; doi:10.1101/gad.336487.120), 2020-07-01

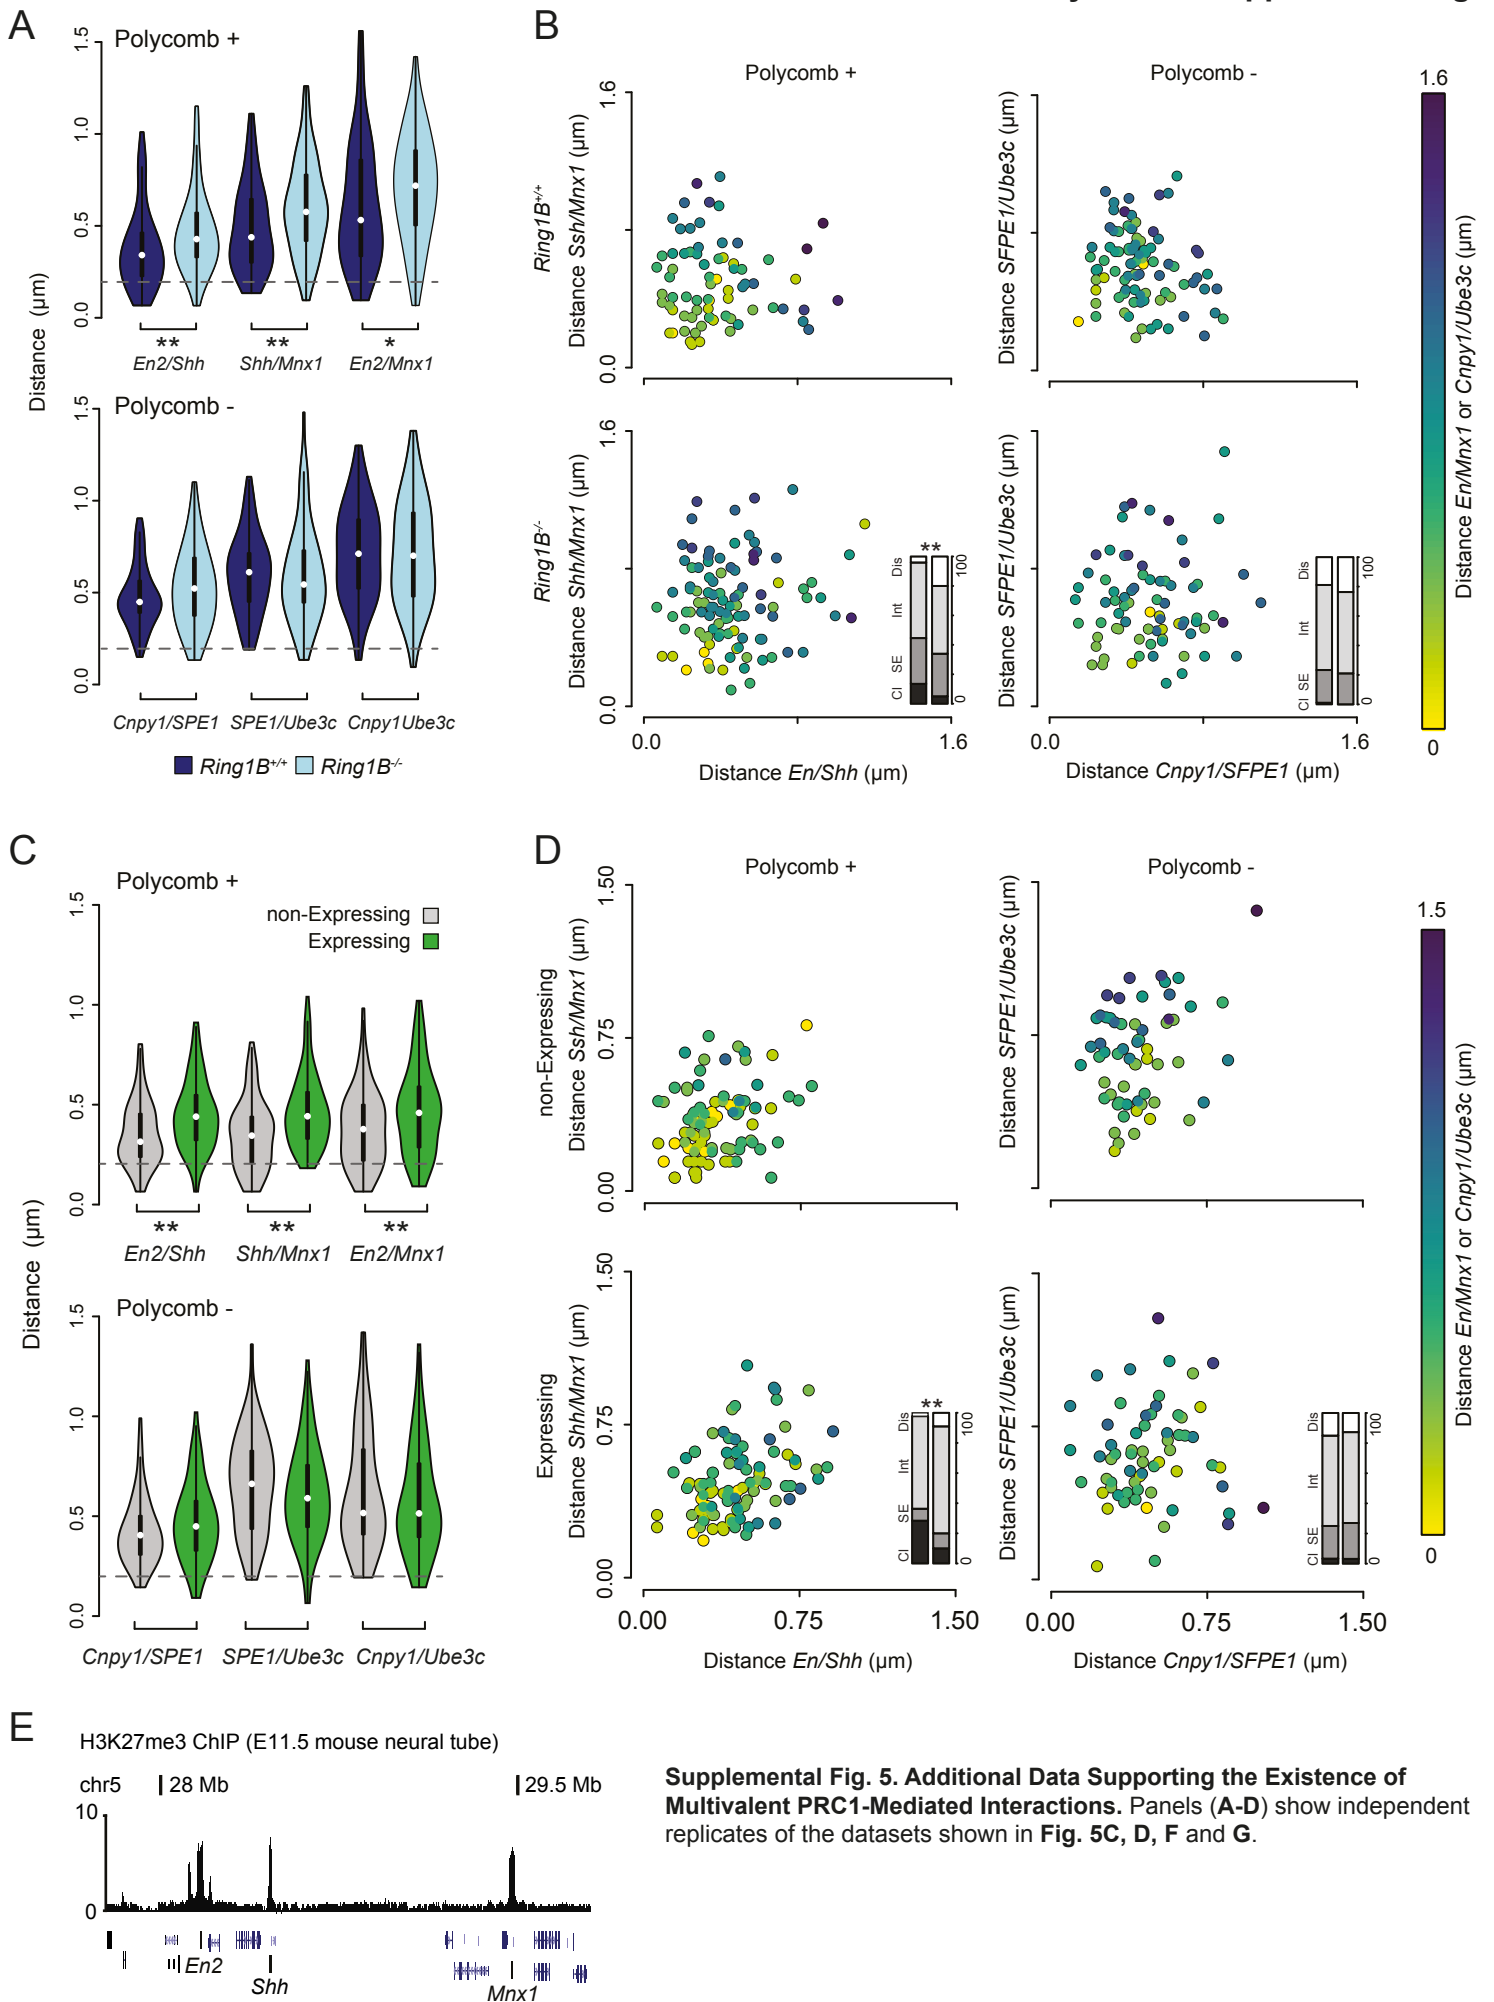

Supplement: supp_gad.336487.120_Supplemental_Fig_5.pdf [file supp_gad.336487.120_Supplemental_Fig_5.pdf]
